# Supplementary material
Source: PubMed Central journal article supplement (PMC5052662)
Supplement: es6b01602_si_001.pdf [file es6b01602_si_001.pdf]

## Supporting Information for

### **Results from Screening Polyurethane Foam Based Consumer Products for Flame Retardant Chemicals: Assessing Impacts on the Change in the Furniture Flammability Standards**

Ellen M. Cooper\*, Gretchen Kroeger\*, Katherine Davis, Charlotte Clark, P. Lee Ferguson and Heather M. Stapleton

\*- Co-First Authors

Nicholas School of the Environment, Duke University, Durham, North Carolina USA

Number of pages: 5

Number of Tables: 1

Number of Figures: 1

Supporting Information includes:

1. A table providing the chemical names, acronyms, CAS numbers and chemical structures of the flame retardants included in foam screening.
2. A figure showing detection frequencies of flame retardants in all categories included in the study.

\*Corresponding Author:

Heather Stapleton

Nicholas School of the Environment

Duke University

A220 LSRC Box 90328

Durham, NC 27708 USA

phone: 919-613-8717

fax: 919-684-8741

heather.stapleton@duke.edu

Keywords: Flame Retardants, foam, PUF, TB117, furniture, PentaBDE, TDCIPP

Table S1. Flame retardants included in foam screening.

| Compound                                | CAS                                     | Structure                                                                            | Flame Retardant Products   |
|-----------------------------------------|-----------------------------------------|--------------------------------------------------------------------------------------|----------------------------|
| <b>Non-halogenated organophosphates</b> |                                         |                                                                                      |                            |
| Triphenyl phosphate (TPHP)              | 115-86-6                                | 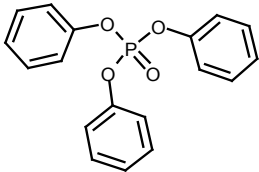   | FireMaster® 550, TBPP, MPP |
| Isopropylated TPHPs (various isomers)   | e.g., 55864-04-5, 55864-07-8, 2502-15-0 |    | FireMaster® 550            |
| Methyl phenyl phosphates                | e.g., 78-31-9, 34909-69-8, 78-32-0      |   | MPP                        |
| t-butylated phenyl phosphates           | e.g., 981-40-8, 115-87-7, 78-33-1       |  | TBPP                       |

Table S1. Flame retardants included in foam screening (cont.)

| Compound                                                                                    | CAS          | Structure | Flame Retardant Products              |
|---------------------------------------------------------------------------------------------|--------------|-----------|---------------------------------------|
| <b>Chlorinated organophosphates</b>                                                         |              |           |                                       |
| tris(1,3-dichloro-2-propyl) phosphate (TDCIPP)                                              | 13674-87-8   |           | TDCIPP                                |
| tris(1-chloro-2-propyl) phosphate (TCIPP)                                                   | 13674-84-5   |           | TCIPP                                 |
| tris(1-chloro-2-ethyl) phosphate (TCEP)                                                     | 115-96-8     |           | Antiblaze V6 (present as an impurity) |
| 2,2-bis(chloromethyl) propane-1,3-diyl-tetrakis(2-chloroethyl)bis(phosphate) (V6)           | 38051-10-4   |           | Antiblaze V6                          |
| 2,2-bis(chloromethyl)propane-1,3-diyl tetrakis(1-chloropropan-2-yl) bis(phosphate) (U-OPFR) | 1047637-37-5 |           | trade name unknown                    |

Table S1. Flame retardants included in foam screening (cont.)

| Compound                                            | CAS                                      | Structure                                                                                                                               | Flame Retardant Products |
|-----------------------------------------------------|------------------------------------------|-----------------------------------------------------------------------------------------------------------------------------------------|--------------------------|
| <b>Bromodiphenyl ethers</b>                         |                                          |                                                                                                                                         |                          |
| e.g., BDE-47, BDE-99, BDE-100                       | e.g., 5436-43-1, 60348-60-9, 189084-64-8 | 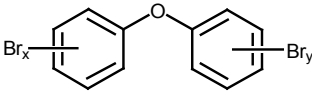 <p style="text-align: center;">(x + y = 4 to 6)</p> | PentaBDE                 |
| <b>Other Br FRs</b>                                 |                                          |                                                                                                                                         |                          |
| 2-ethylhexyl-2,3,4,5-tetrabromobenzoate (TBB)       | 183658-27-7                              |                                                      | FireMaster® 550          |
| bis(2-ethylhexyl-2,3,4,5-tetrabromophthalate (TBPH) | 26040-51-7                               |                                                       | FireMaster® 550          |

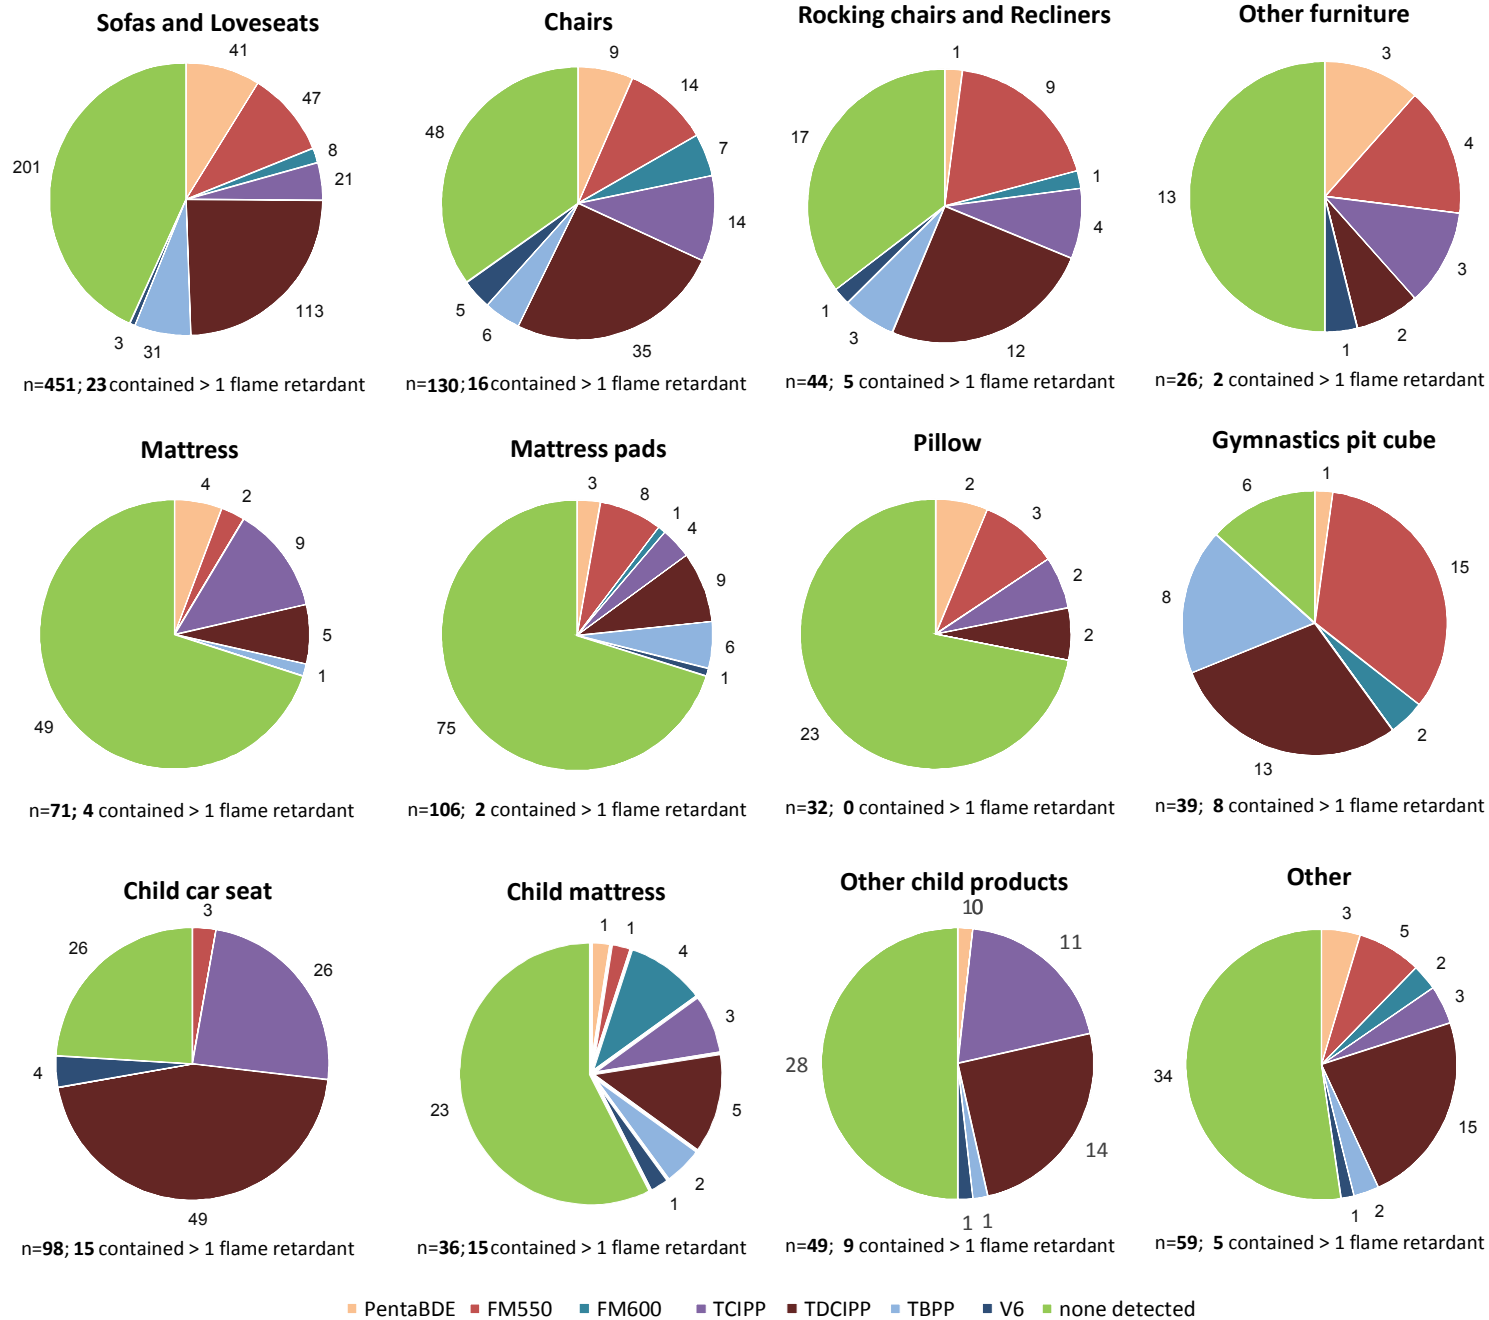

**Figure S1. Detection of FRs in all product categories.**
